# Supplementary material
Source: ML conference proceedings conference paper supplement (https://openreview.net/forum?id=Ecb6HBoo1r)
Supplement: supplementary_material [file attachment]

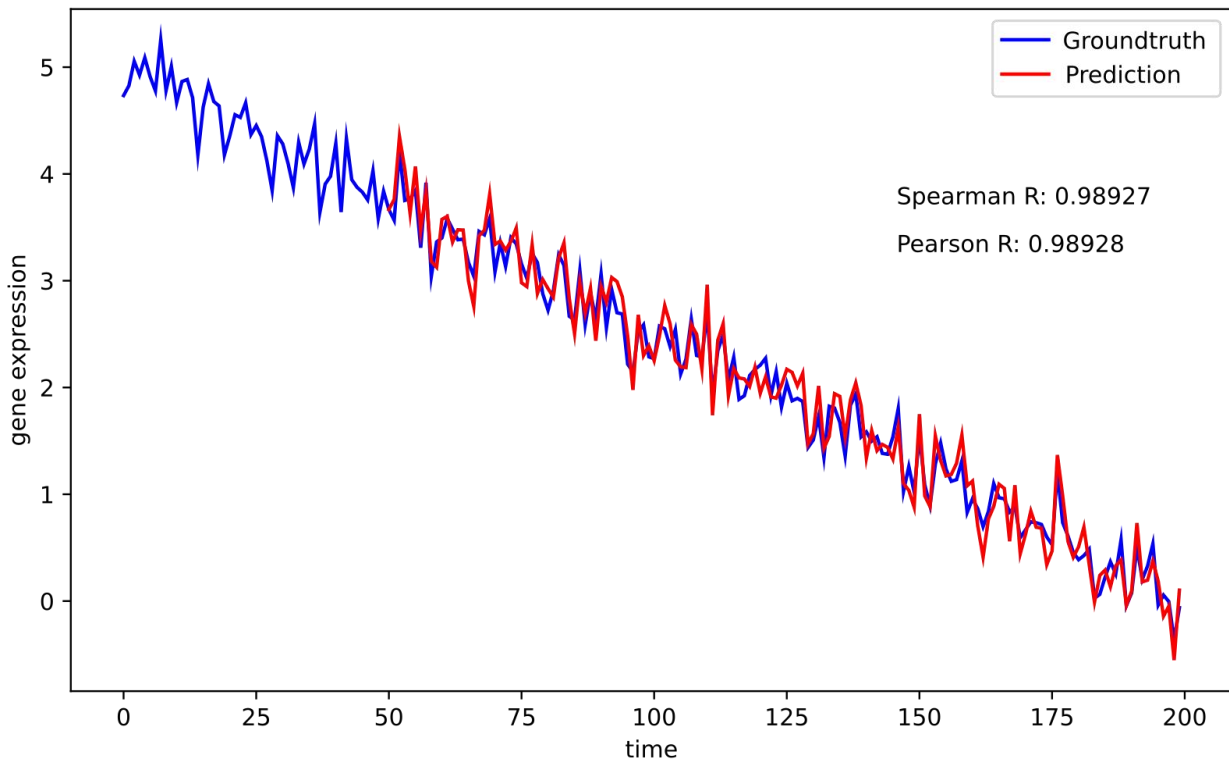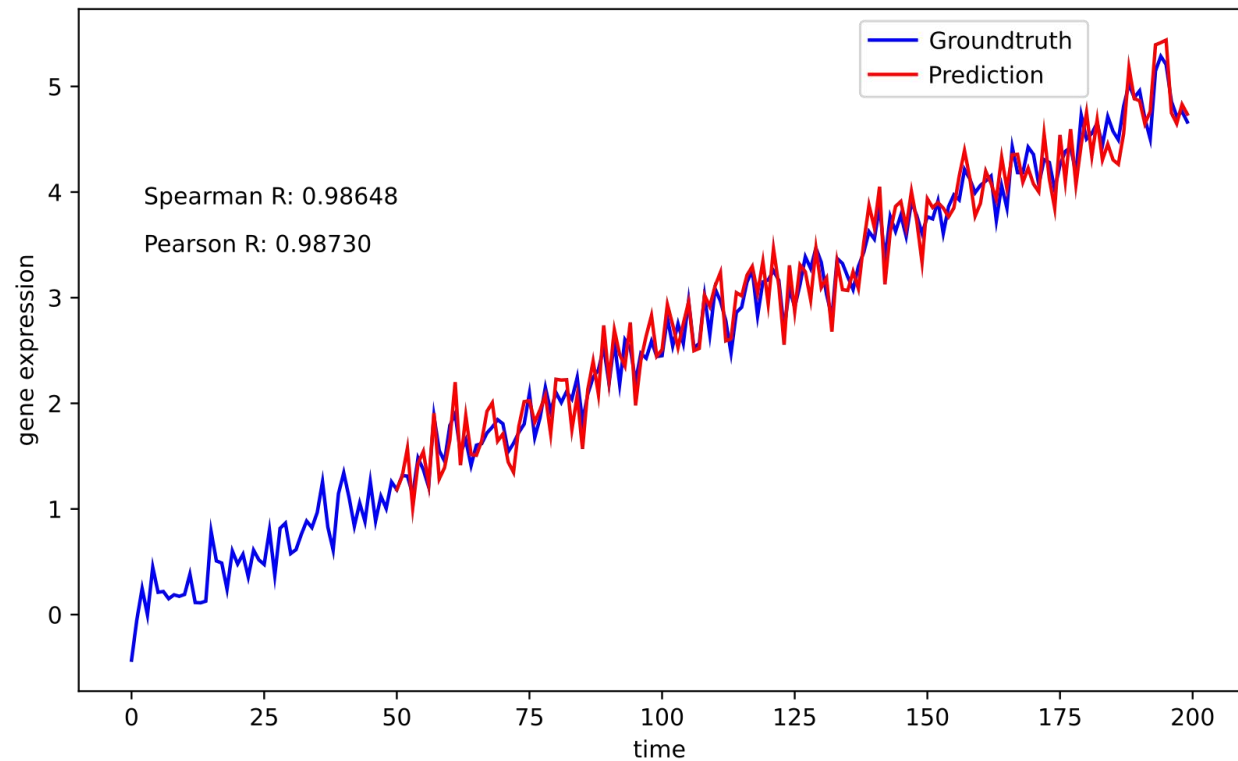

The left plot shows the predicted and ground truth gene expression of Nanog, while the right plot depicts the same for the Ets1. We can observe that both Spearman and Pearson values exceed 0.98, demonstrating that MTGRN effectively models gene expression.
